# Supplementary material for: Enhanced photocatalytic performances of TiO2-graphene hybrids on nitro-aromatics reduction to amino-aromatics
Source: Royal Society of Chemistry journal article supplement (doi:10.1039/c3ra42579g), 2013-01-01
Supplement: c3ra42579g.pdf [file c3ra42579g.pdf]

## Supporting Information

### Enhanced photocatalytic performances of TiO<sub>2</sub>-graphene hybrids on nitro-aromatics reduction to amino-aromatics

Chao Xu, Yao Yuan, Rusheng Yuan, and Xianzhi Fu

Research Institute of Photocatalysis, State Key Laboratory Breeding Base of  
Photocatalysis, Fuzhou University, Fuzhou 350002, People's Republic of China

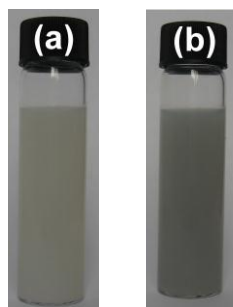

Fig. 1S Typical photos of (a) TiO<sub>2</sub>-GO<sub>1%</sub> and (b) TiO<sub>2</sub>-G<sub>1%</sub> samples.

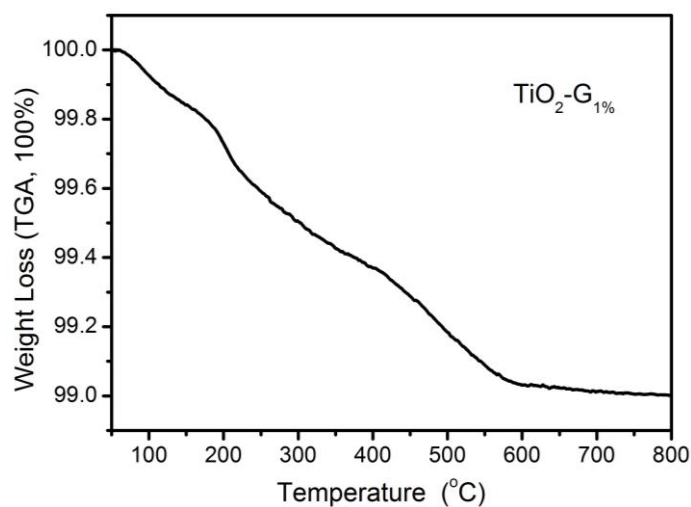

Fig.2S TGA curves of typical TiO<sub>2</sub>-G<sub>1%</sub> samples

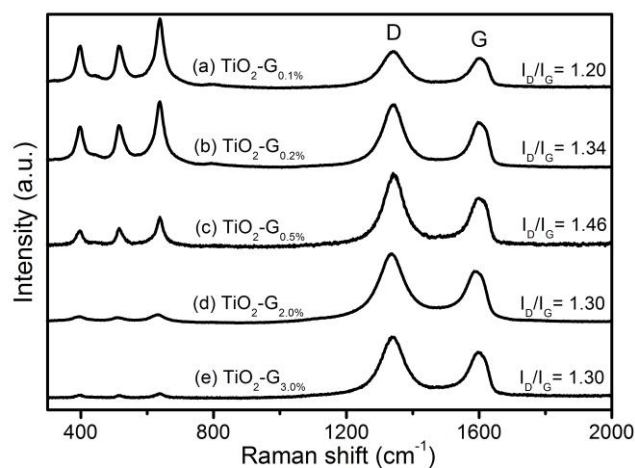

Fig. 3S Raman spectra of TiO<sub>2</sub>-G samples

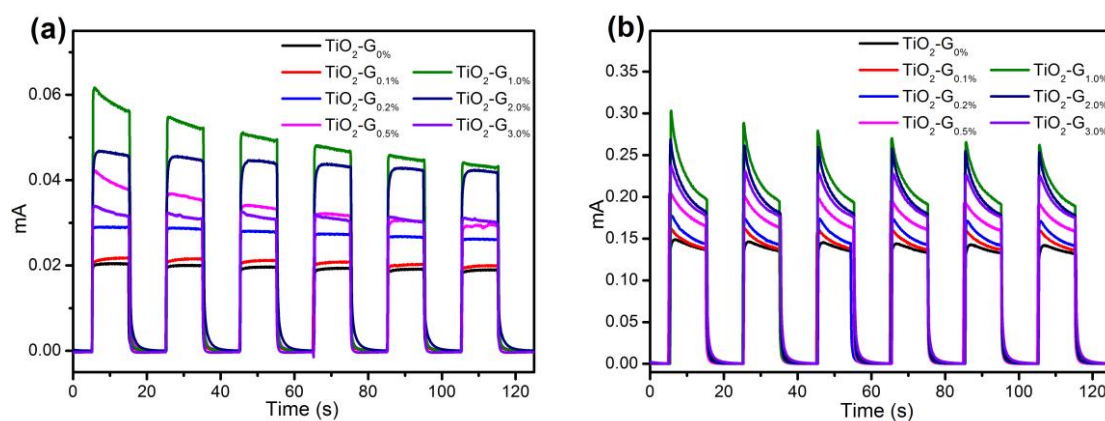

Fig. 4S Photocurrent responses of TiO<sub>2</sub>-G samples: (a) 0.2 M Na<sub>2</sub>SO<sub>4</sub> solution as electrolyte, (b) 0.2 M Na<sub>2</sub>SO<sub>4</sub> solution with oxalic acid (8 mM) as electrolyte.

Table 1S Cycle photocatalysis reduction of 4-nitrophenol over TiO<sub>2</sub>-G<sub>1%</sub> sample

| Cycle times | Conversion (%) | Yield (%) |
|-------------|----------------|-----------|
| 1           | 100            | 93.9      |
| 2           | 84.8           | 83.7      |
| 3           | 74.5           | 65.5      |
